# Supplementary material for: Simultaneous enhancement of magnetocaloric and magnetodielectric effects in MnCo 2 O 4 spinels by varying the Co/Mn ratio
Source: Royal Society of Chemistry journal article supplement (doi:10.1039/d4tc05489j), 2025-01-01
Supplement: d4tc05489j1.pdf [file d4tc05489j1.pdf]

## Electronic Supplementary Information

### Simultaneous enhancement of magnetocaloric and magnetodielectric effect in $\text{MnCo}_2\text{O}_4$ spinels by varying Co/Mn ratio

Ruixia Ti,<sup>\*ab</sup> Chaoyang Wang,<sup>ab</sup> Huarui Wu,<sup>ab</sup> Chenyang Zhang,<sup>c</sup> Shujie Sun,<sup>\*d</sup>  
Na Li,<sup>ab</sup> Yun Su,<sup>ab</sup> Bin Wang,<sup>ab</sup> Zezhang Chen<sup>\*ab</sup> and Yan Wang<sup>ab</sup>

<sup>a</sup> School of Physics and Electronic Engineering, Xinxiang University, Xinxiang 453003, China

<sup>b</sup> Henan Province Engineering Research Center of New Energy Storage System, Xinxiang University, Xinxiang 453003, China

<sup>c</sup> School of Chemistry and Materials Engineering, Xinxiang University, Xinxiang 453003, China

<sup>d</sup> Henan Collaborative Innovation Center of Energy-Saving Building Materials, Xinyang Normal University, Xinyang 464000, China

<sup>\*</sup> Corresponding Author: [tiruixia@yeah.net](mailto:tiruixia@yeah.net), [sjsun@xynu.edu.cn](mailto:sjsun@xynu.edu.cn),

[zezhangchen@126.com](mailto:zezhangchen@126.com)

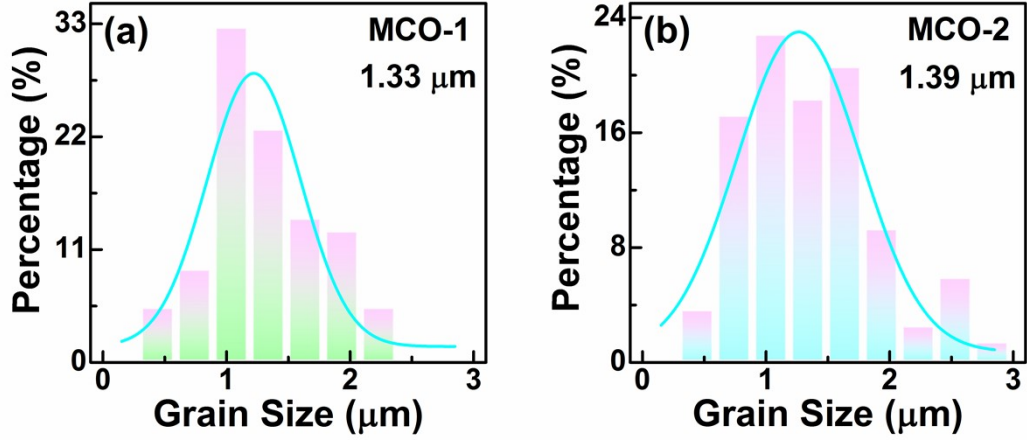

**Fig. S1** The grain size distribution of (a) MCO-1 and (b) MCO-2 ceramics.

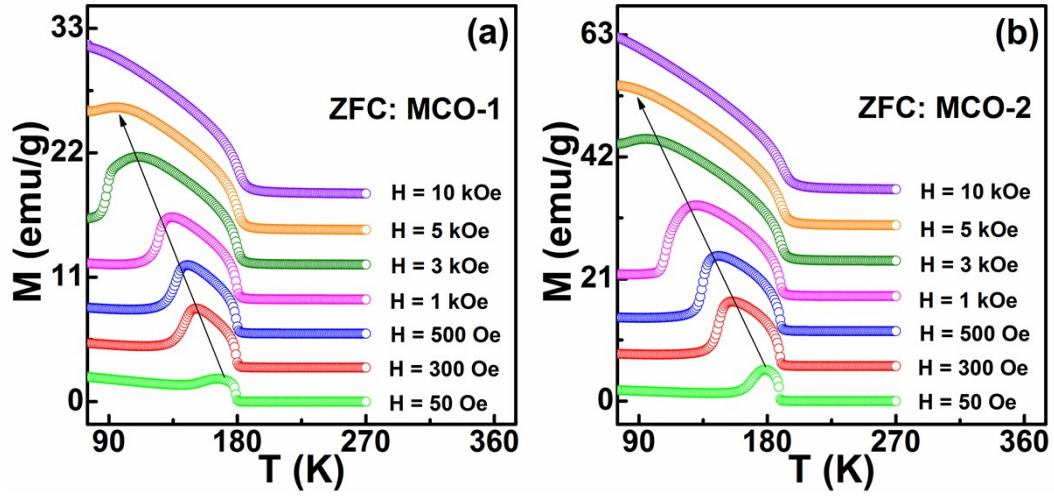

**Fig. S2** Magnetization as a function of temperature measured at various magnetic fields under ZFC process for (a) MCO-1 and (b) MCO-2 ceramics.

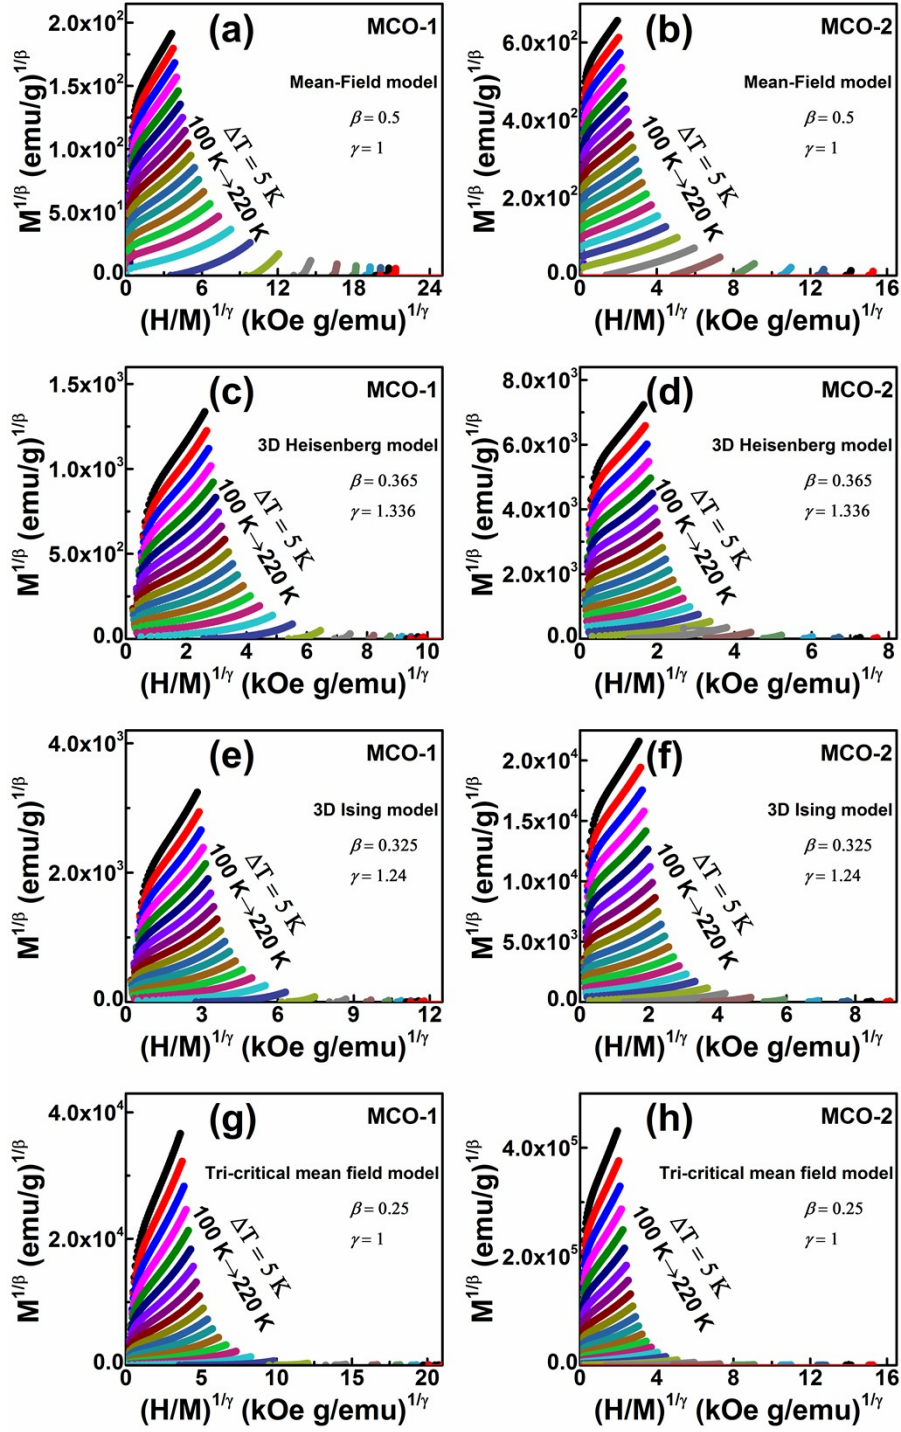

**Fig. S3** Modified Arrott plots (MAP) with the (a)-(b) mean-field model ( $\beta=0.5$ ,  $\gamma=1$ ), (c)-(d) 3D Heisenberg model ( $\beta=0.365$ ,  $\gamma=1.336$ ), (e)-(f) 3D Ising model ( $\beta=0.325$ ,  $\gamma=1.24$ ), and (g)-(h) tri-critical mean field model ( $\beta=0.25$ ,  $\gamma=1$ ) for MCO-1 and MCO-2 ceramics, respectively.

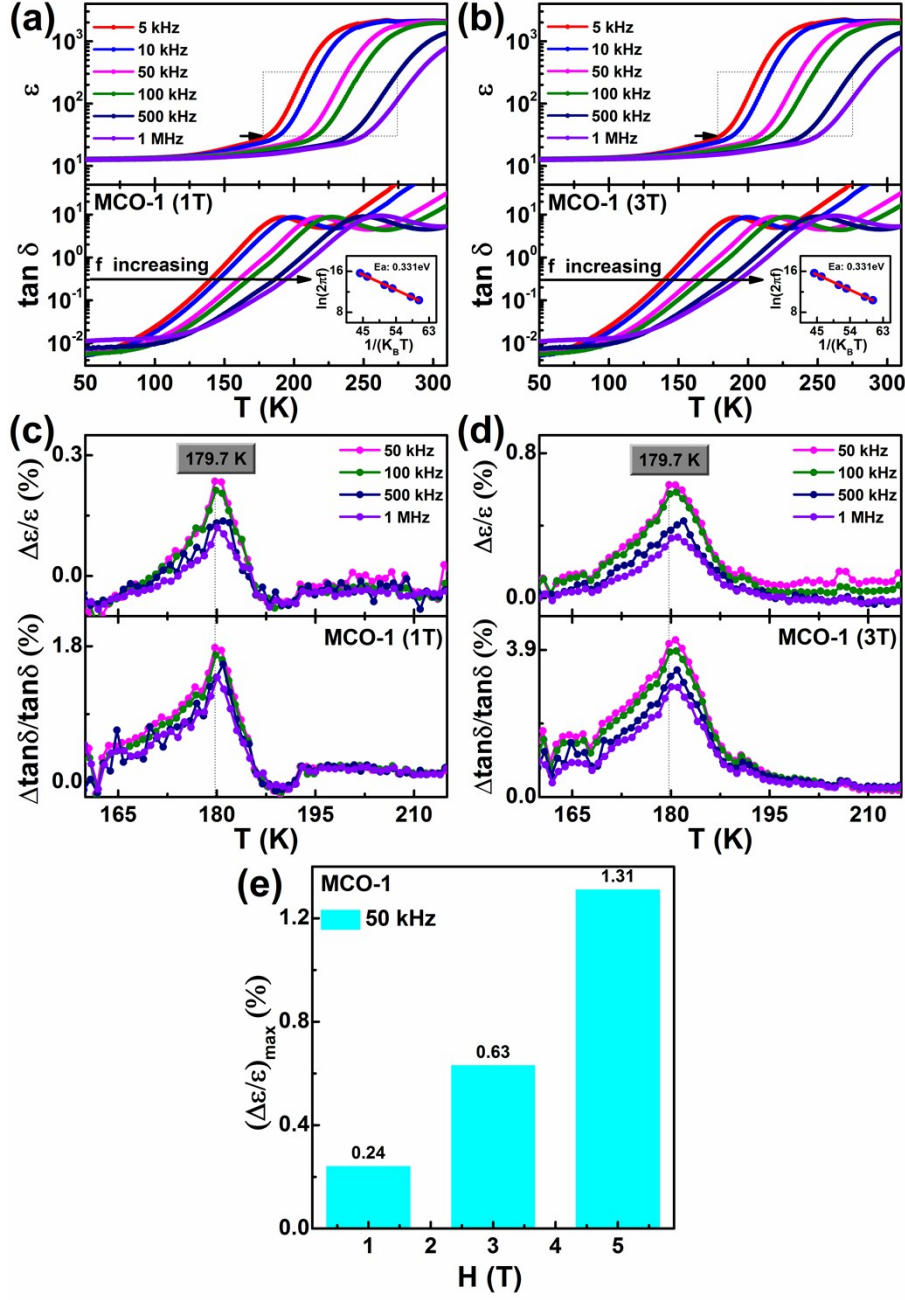

**Fig. S4** Temperature dependent  $\epsilon$  and  $\tan\delta$  of MCO-1 ceramics measured at various frequencies under (a) 1 T and (b) 3 T magnetic fields. The insets give the relation between  $\ln(2\pi f)$  and  $1/(k_B T)$  according to the Arrhenius law for dielectric relaxation in the temperature range of 190-270 K. (c)-(d) The corresponding variations of  $\epsilon$  and  $\tan\delta$  for pure-MCO ceramics measured at various frequencies. (e) The comparison of the maximum values for  $\Delta\epsilon/\epsilon$  (%) at 50 kHz.

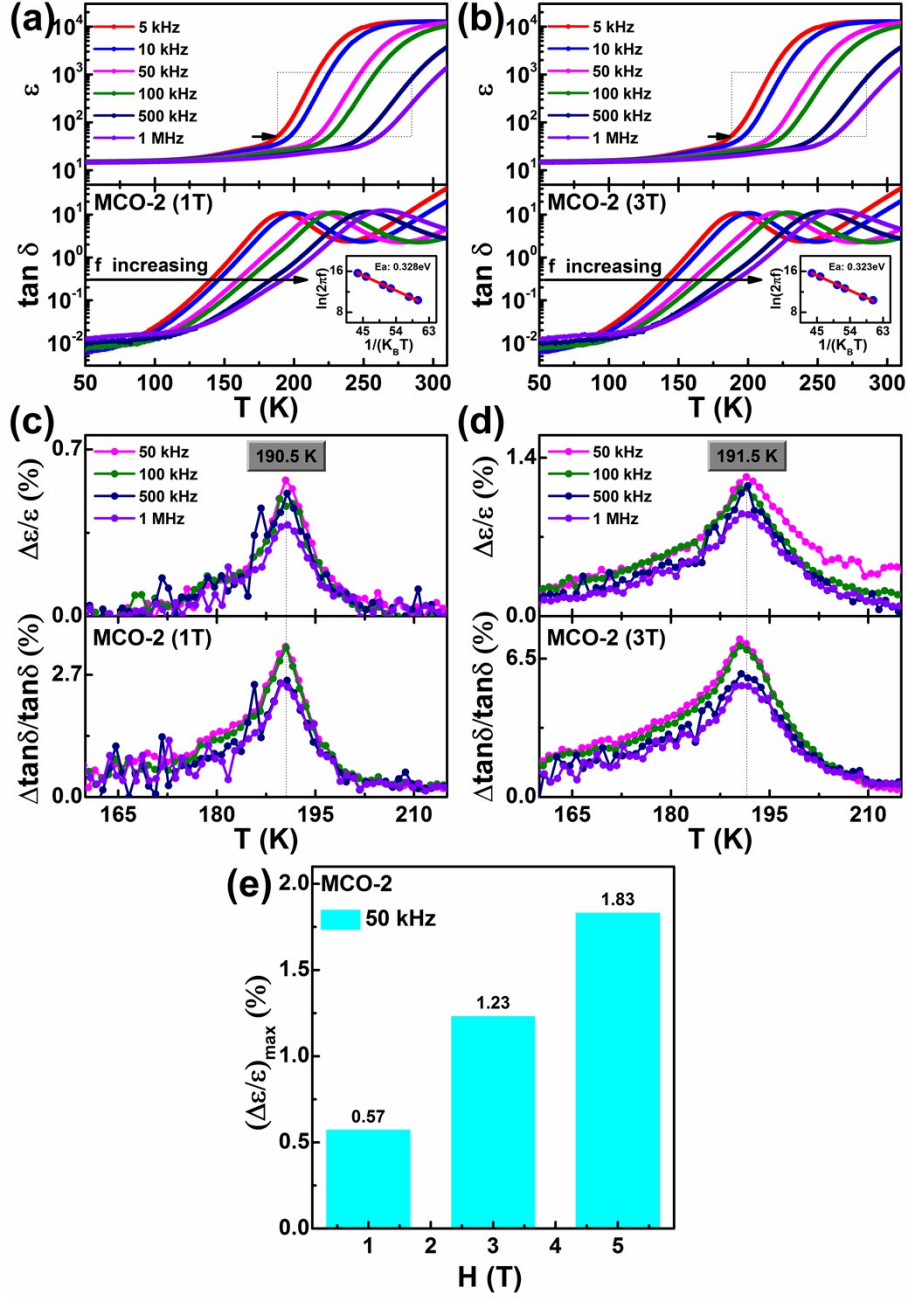

**Fig. S5** Temperature dependent  $\epsilon$  and  $\tan\delta$  of MCO-2 ceramics measured at various frequencies under (a) 1 T and (b) 3 T magnetic fields. The insets give the relation between  $\ln(2\pi f)$  and  $1/(k_B T)$  according to the Arrhenius law for dielectric relaxation in the temperature range of 190-270 K. (c)-(d) The corresponding variations of  $\epsilon$  and  $\tan\delta$  for doped-MCO ceramics measured at various frequencies. (e) The comparison of the maximum values for  $\Delta\epsilon/\epsilon$  (%) at 50 kHz.
